# Supplementary material
Source: Research Square preprint supplement (doi:10.21203/rs.3.rs-9771372/v1)
Supplement: Supplementary file 1 [file 256b32f7fef9bd1e5ce23fcf.docx]

## Supplementary material


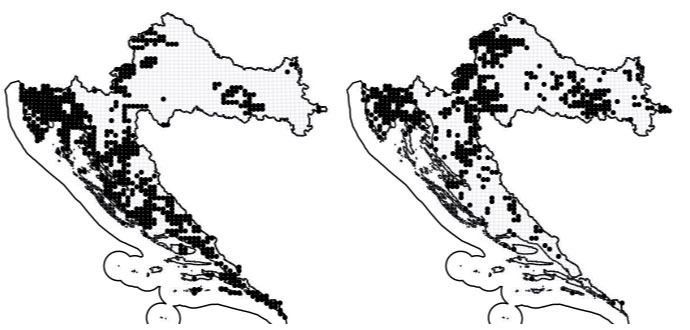


**Supplement Fig. 1** Area of natural occurrence of (left) *Q. pubescens* and (right) *Q. cerris* in Croatia, depicted as black dots. Source: Nikolić, 2015


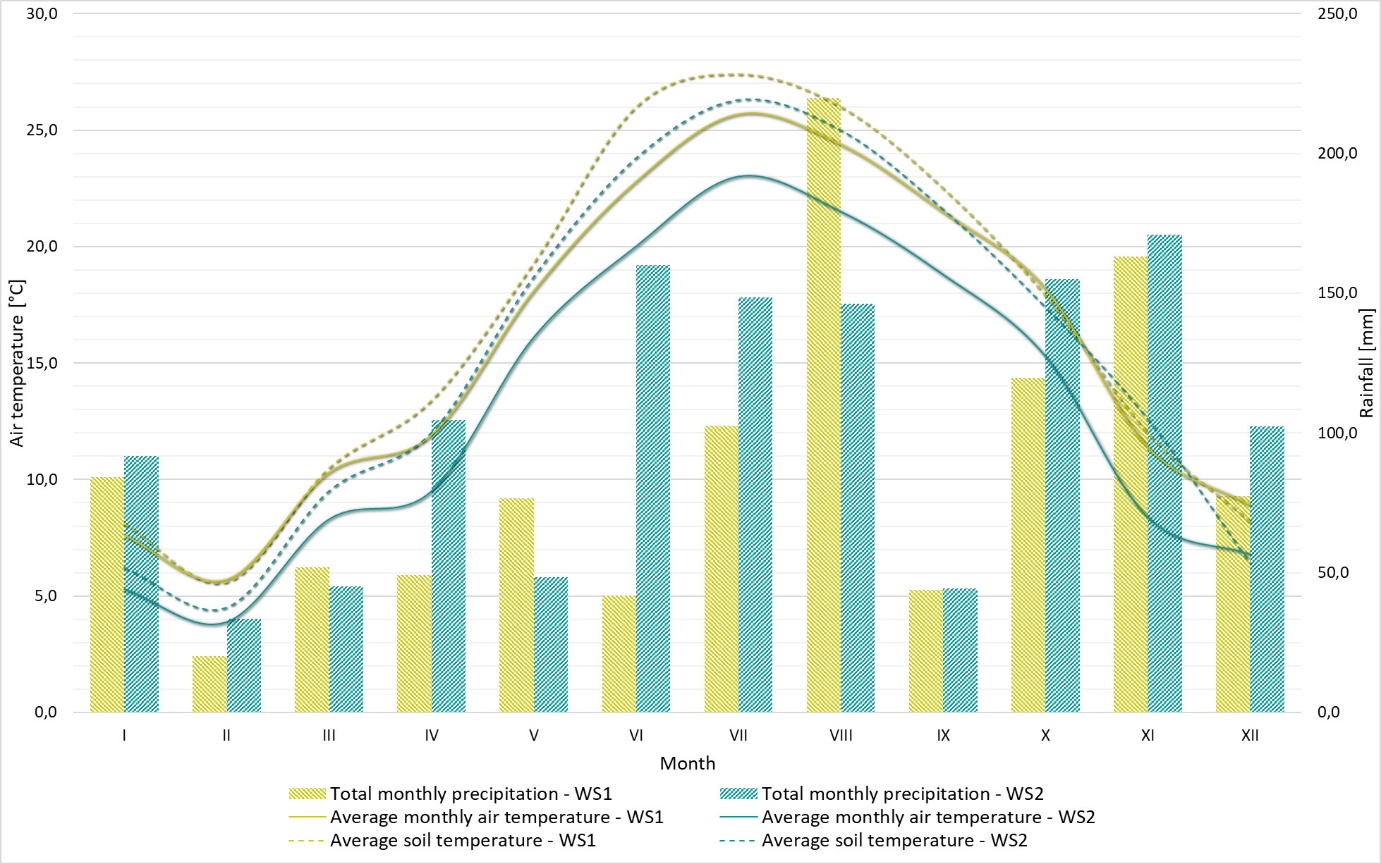


**Supplement Fig. 2** Total monthly precipitation, average monthly air temperature and average monthly soil temperature at a 10 cm depth recorded during the year 2023 on two weather stations (WS1 - Poreč, WS2 - Pazin) of the research area

**Supplement Table 1** Sampling plots properties of identified *Tuber aestivum* productive locations within research area

| ***Quercus pubescens* (total number of sample pairs: 28)** | | | | | | | | |
| --- | --- | --- | --- | --- | --- | --- | --- | --- |
| sampling zone | IN | | | | OUT | | | |
|  | min | med | mean | max | min | med | mean | max |
| altitude [m] | 7 | 282.5 | 225.7 | 421 | 7 | 282.5 | 225.7 | 421 |
| pH | 6.69 | 7.15 | 7.10 | 7.46 | 6.00 | 7.10 | 7.01 | 7.56 |
| sand [%] | 4.36 | 13.61 | 14.65 | 30.32 | 3.25 | 11.18 | 16.16 | 51.54 |
| silt [%] | 47.58 | 63.73 | 64.19 | 86.42 | 35.06 | 62.04 | 62.63 | 86.79 |
| clay [%] | 6.30 | 21.50 | 21.16 | 39.00 | 0.10 | 20.10 | 21.18 | 37.00 |
| C [g kg-1] | 23.94 | 60.09 | 57.35 | 82.92 | 12.86 | 52.81 | 55.77 | 107.73 |
| Ca [g kg-1] | 0.008 | 0.014 | 0.030 | 0.119 | 0.005 | 0.012 | 0.037 | 0.154 |
| K [g kg-1] | 8.43 | 11.91 | 12.18 | 16.44 | 4.46 | 11.40 | 11.71 | 16.48 |
| N [g kg-1] | 2.56 | 4.78 | 4.82 | 6.80 | 1.25 | 4.60 | 4.52 | 8.16 |
| P [g kg-1] | 0.087 | 0.142 | 0.166 | 0.901 | 0.076 | 0.123 | 0.165 | 1.357 |
| ***Quercus cerris* (total number of sample pairs: 37)** | | | | | | | | |
| sampling zone | IN | | | | OUT | | | |
|  | min | med | mean | max | min | med | mean | max |
| altitude [m] | 284 | 376.0 | 373.7 | 443 | 284 | 376.0 | 373.7 | 443 |
| pH | 6.57 | 7.20 | 7.17 | 7.83 | 5.99 | 7.20 | 7.13 | 8.05 |
| sand [%] | 8.42 | 13.77 | 14.76 | 34.19 | 7.90 | 13.51 | 15.55 | 44.05 |
| silt [%] | 45.51 | 63.70 | 64.08 | 85.55 | 45.18 | 64.70 | 64.13 | 83.66 |
| clay [%] | 3.60 | 23.50 | 21.16 | 38.30 | 0.60 | 17.90 | 20.31 | 40.50 |
| C [g kg-1] | 26.69 | 57.04 | 60.31 | 131.50 | 14.11 | 55.43 | 57.94 | 122.48 |
| Ca [g kg-1] | 0.008 | 0.035 | 0.057 | 0.148 | 0.006 | 0.033 | 0.055 | 0.147 |
| K [g kg-1] | 9.87 | 13.88 | 13.80 | 17.80 | 9.40 | 13.87 | 13.73 | 18.08 |
| N [g kg-1] | 2.92 | 4.42 | 4.78 | 8.46 | 1.43 | 4.35 | 4.46 | 8.15 |
| P [g kg-1] | 0.070 | 0.124 | 0.397 | 2.977 | 0.057 | 0.137 | 0.403 | 3.144 |

**Supplement Table 2** Average monthly air temperature of dry thermometer (Croatian Meteorological and Hydrological Service, 2025), average monthly soil temperature on 10 cm depth and total monthly precipitation (Croatian Meteorological and Hydrological Service, 2024a and 2024b) recorded during the sampling year (2023) from two weather stations (WS1 - Poreč and WS2 - Pazin) of the research area (Figure 1)

|  | ***Month*** | | | | | | | | | | | |
| --- | --- | --- | --- | --- | --- | --- | --- | --- | --- | --- | --- | --- |
| **Station** | **I** | **II** | **III** | **IV** | **V** | **VI** | **VII** | **VIII** | **IX** | **X** | **XI** | **XII** |
| *Average monthly air temperature [°C] of the dry thermometer* | | | | | | | | | | | | |
| **Pazin** | 5,3 | 3,9 | 8,3 | 9,5 | 16,1 | 20,0 | 23,0 | 21,5 | 18,8 | 15,3 | 8,4 | 6,8 |
| **Poreč** | 7,6 | 5,7 | 10,3 | 11,9 | 18,1 | 22,8 | 25,7 | 24,4 | 21,5 | 18,2 | 11,4 | 8,9 |
| *Average monthly soil temperature [°C] at 10 cm depth* | | | | | | | | | | | | |
| **Pazin** | 6,2 | 4,5 | 9,5 | 12,0 | 18,7 | 23,8 | 26,3 | 25,0 | 21,6 | 17,4 | 12,6 | 6,4 |
| **Poreč** | 8,1 | 5,6 | 10,5 | 13,4 | 19,3 | 26,0 | 27,4 | 26,0 | 22,5 | 17,9 | 12,0 | 8,2 |
| *Total monthly precipitation [mm]* | | | | | | | | | | | | |
| **Pazin** | 91,7 | 33,4 | 45,0 | 104,5 | 48,5 | 160,0 | 148,4 | 146,2 | 44,3 | 155,1 | 170,8 | 102,4 |
| **Poreč** | 84,1 | 20,2 | 52,0 | 49,1 | 76,7 | 41,8 | 102,5 | 219,8 | 43,8 | 119,8 | 163,0 | 77,4 |
